# Supplementary material
Source: PubMed Central journal article supplement (PMC6408259)
Supplement: NIHMS1514256-supplement-1.pdf [file NIHMS1514256-supplement-1.pdf]

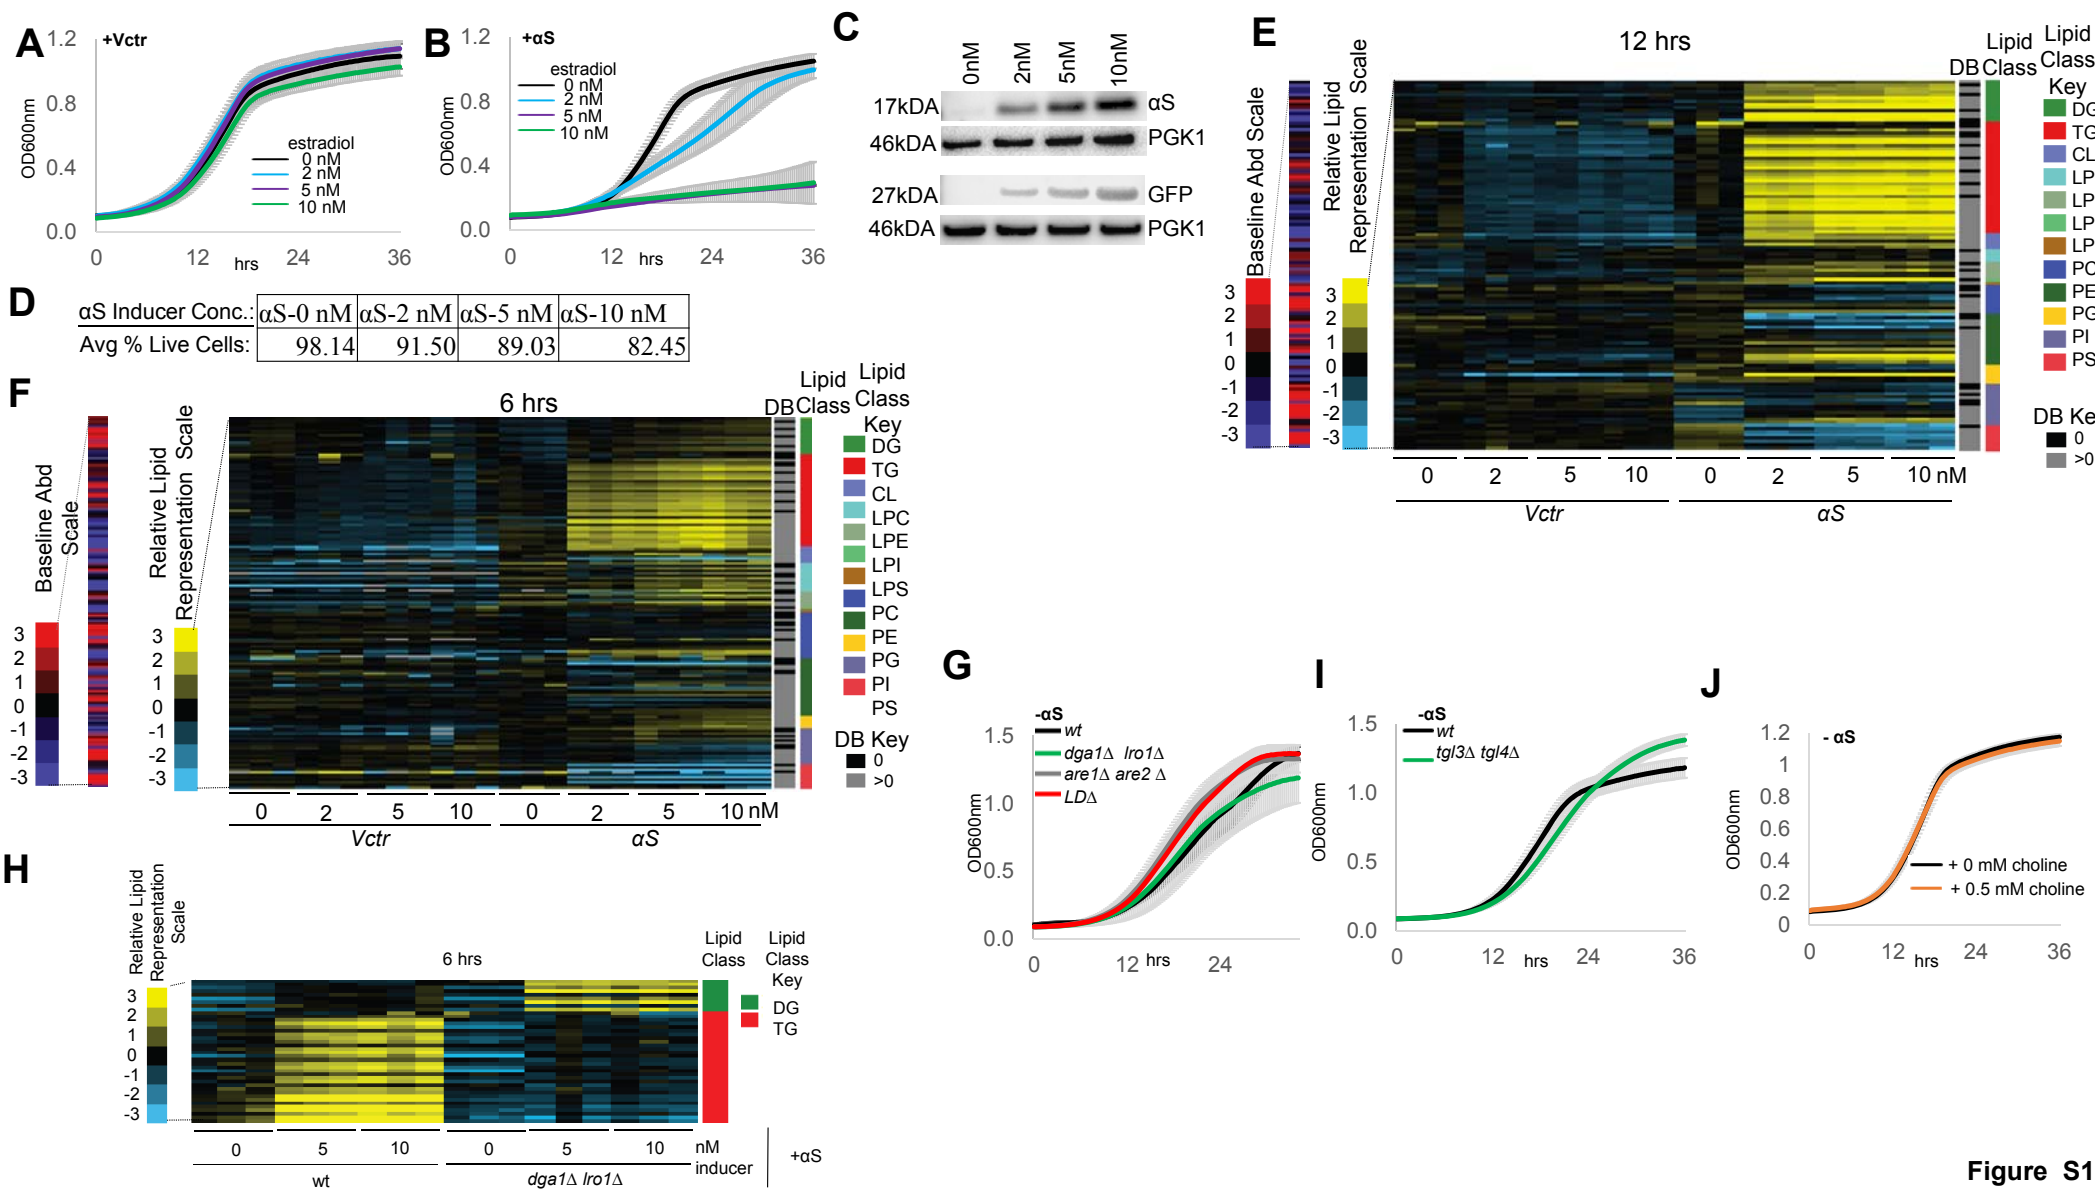

Figure S1

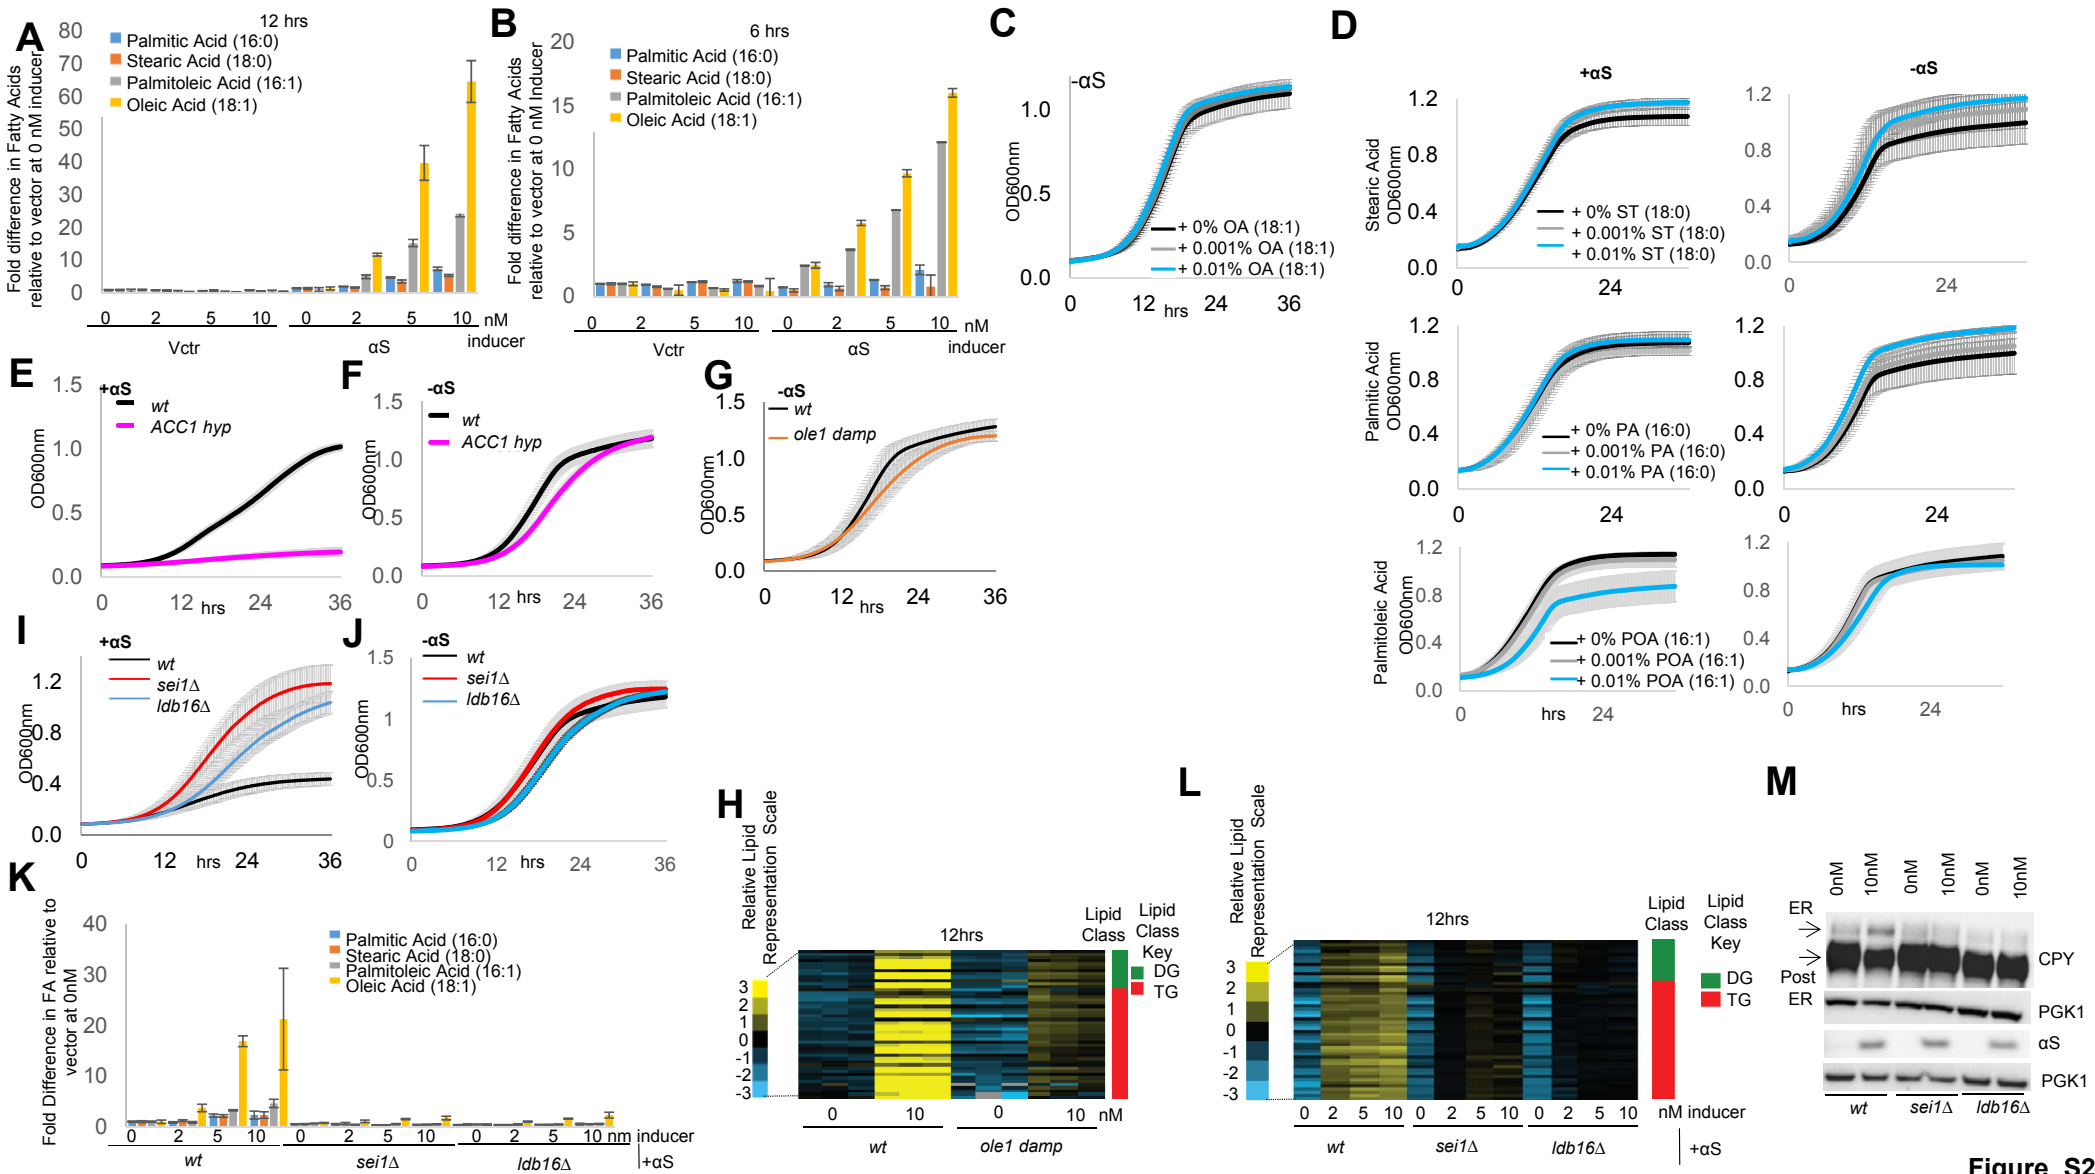

**Figure S2**

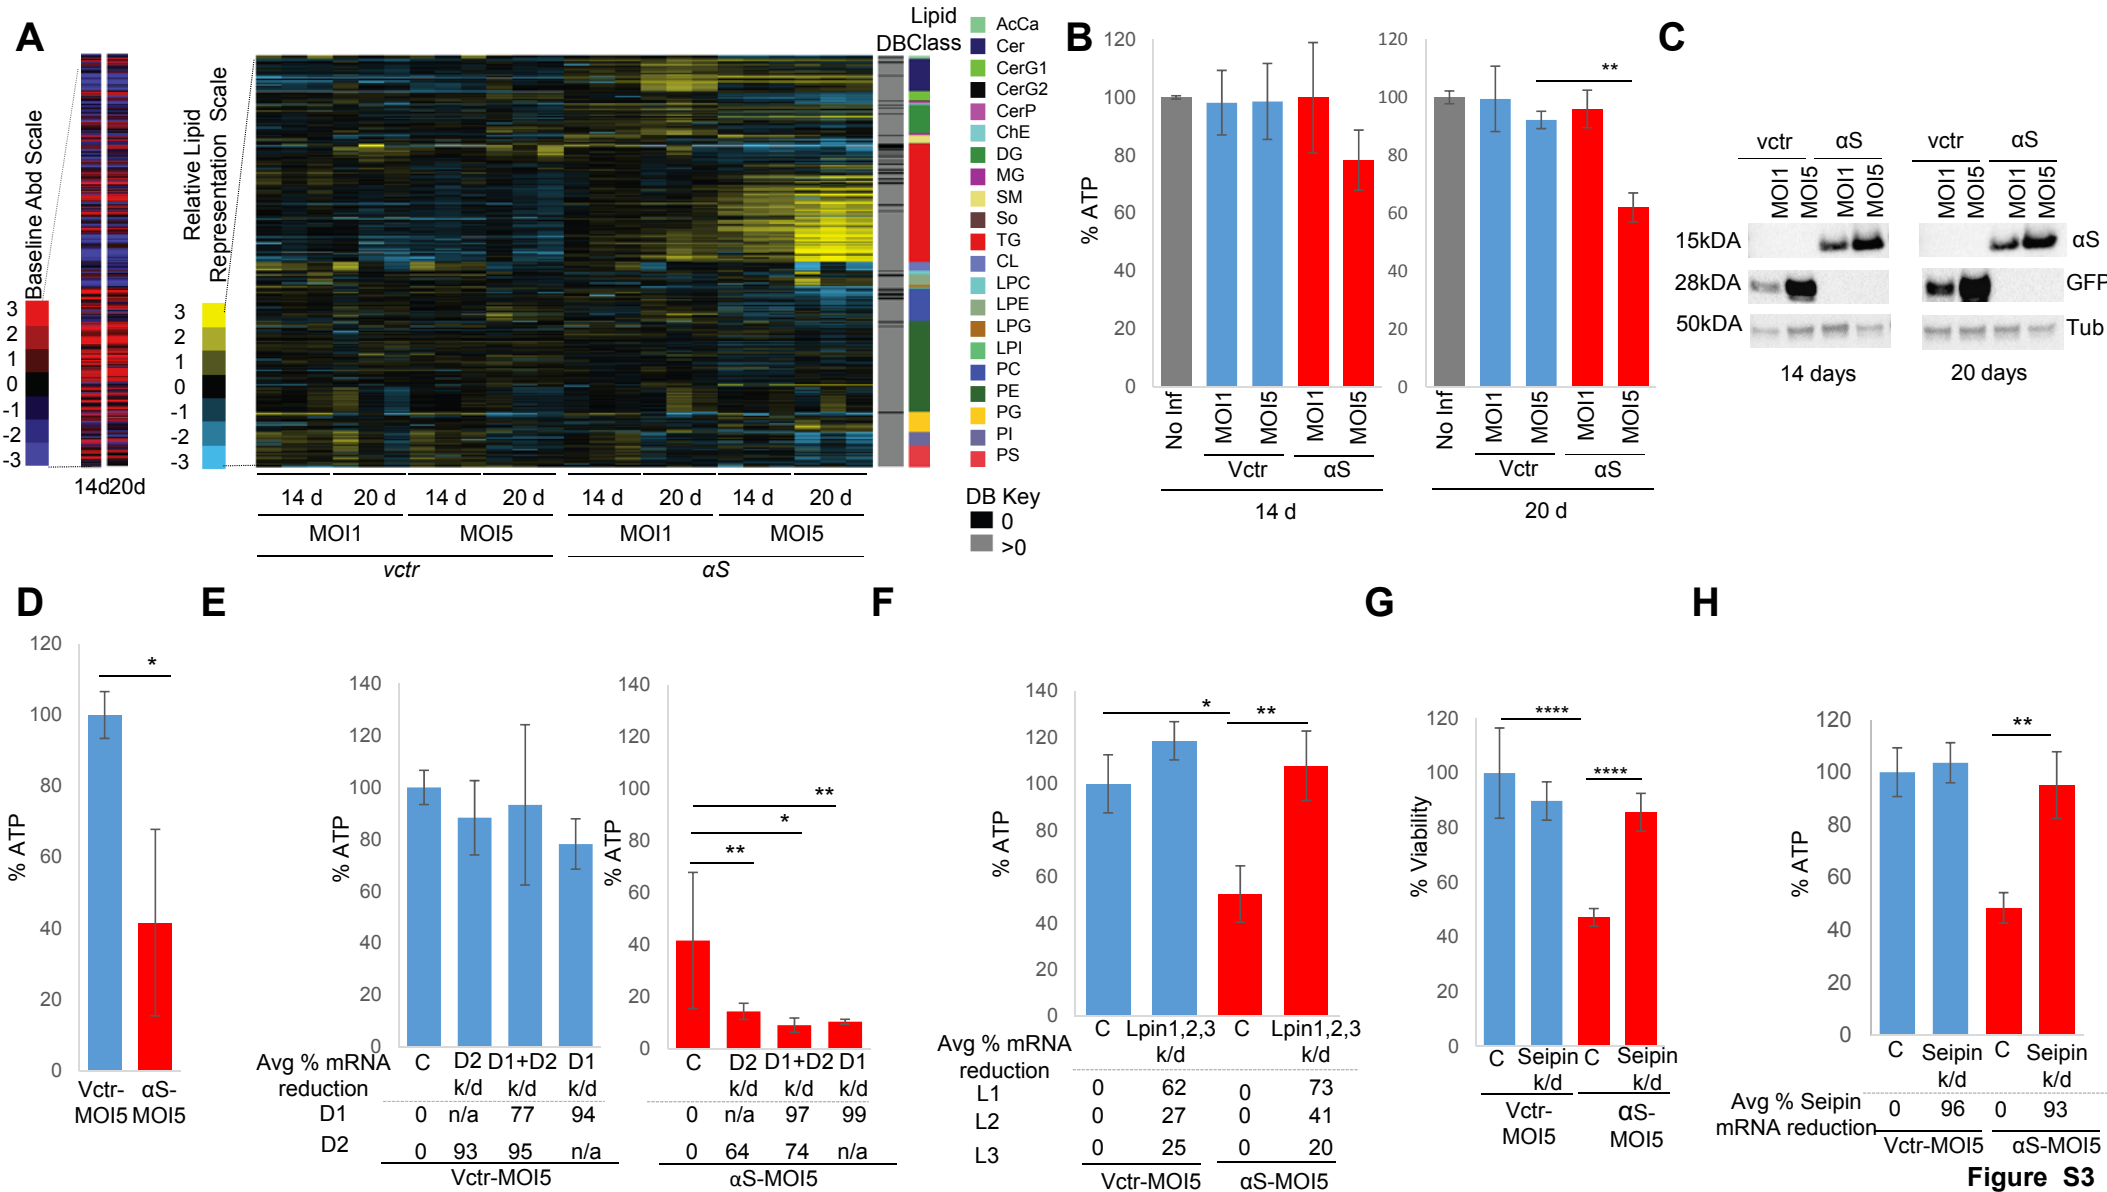

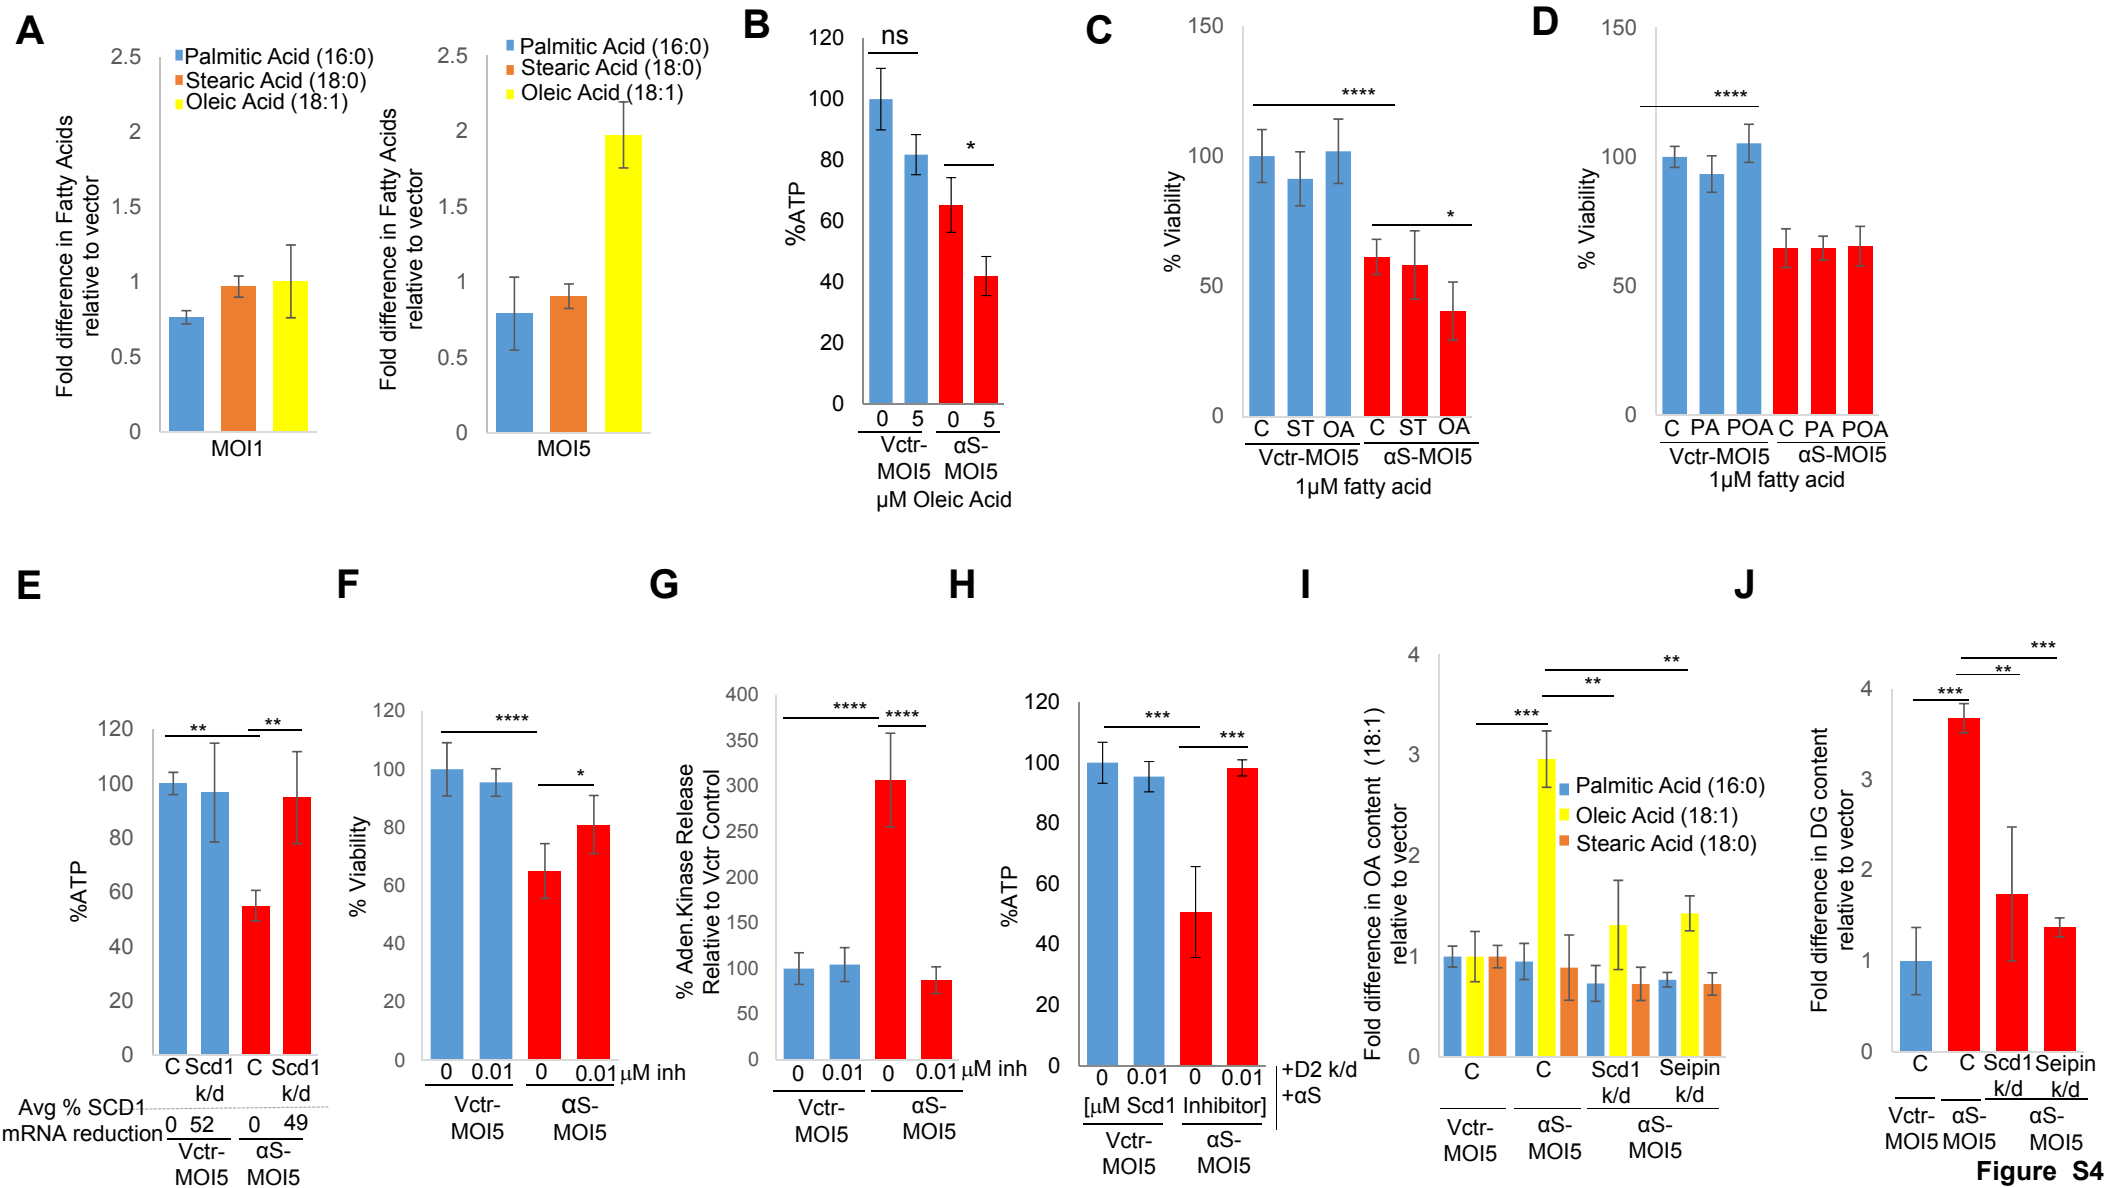

**Figure S4**

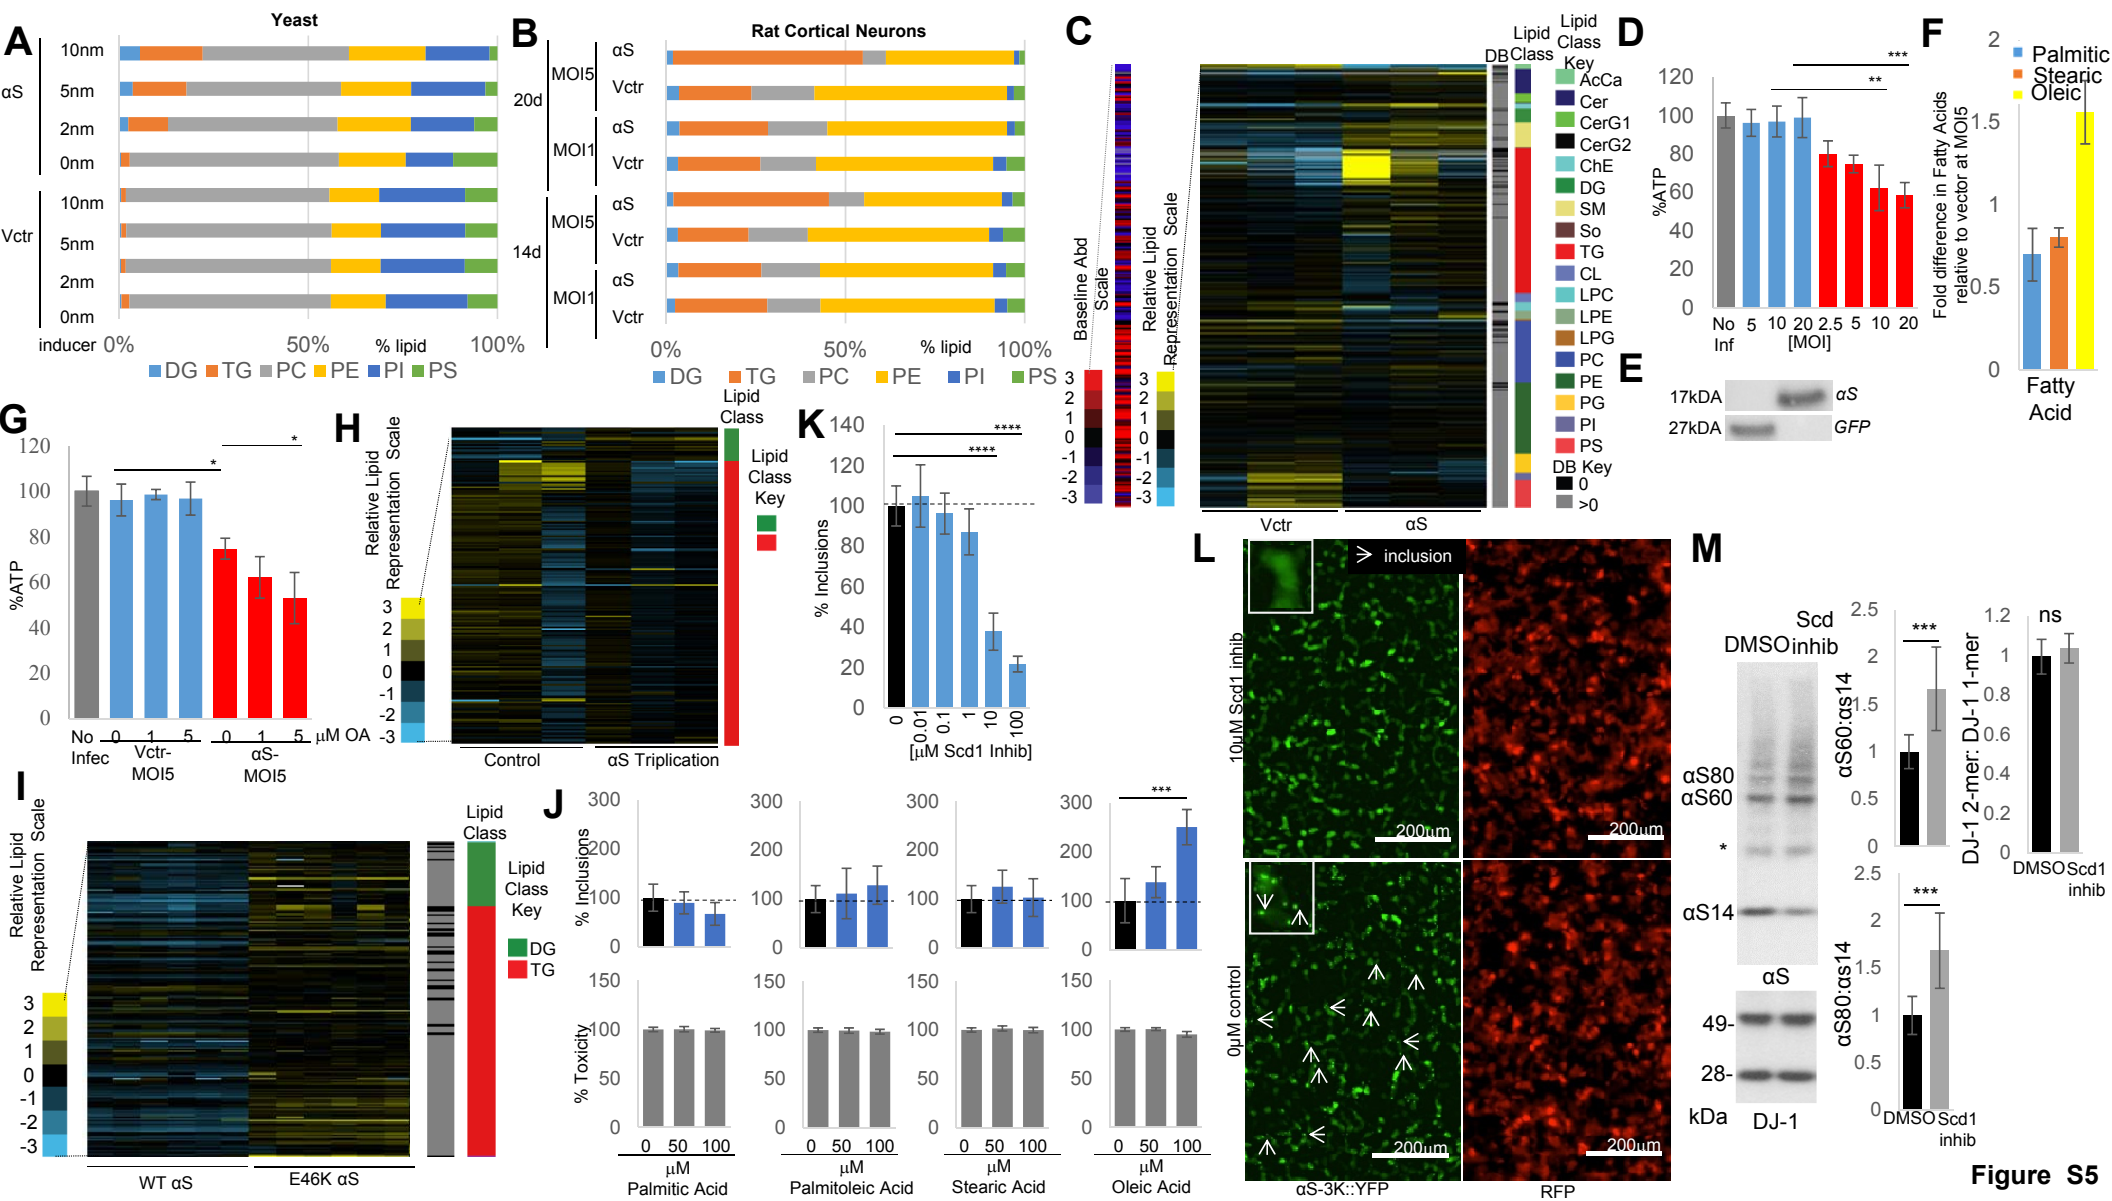

**Figure S5**

**A** Intact Homeostasis/Equilibrium

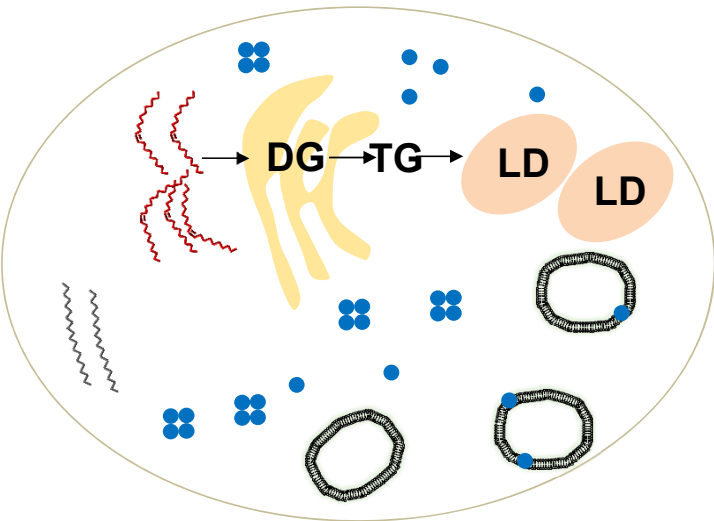

**C**  $\alpha$ S-Induced Dyshomeostasis - Uncompensated

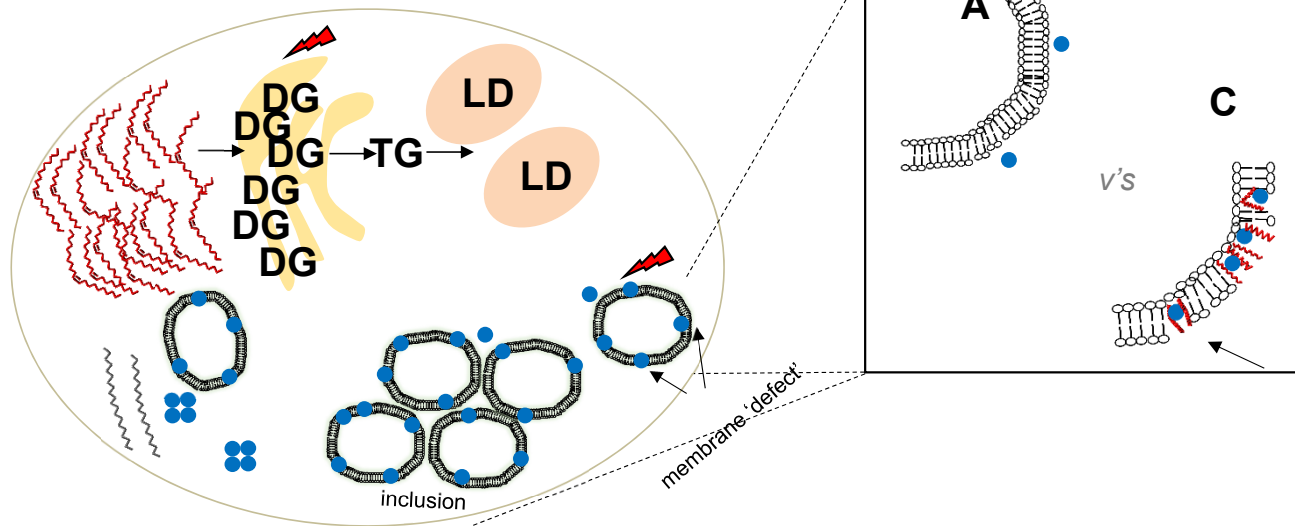

**B**  $\alpha$ S-Induced Dyshomeostasis - Initially Compensated

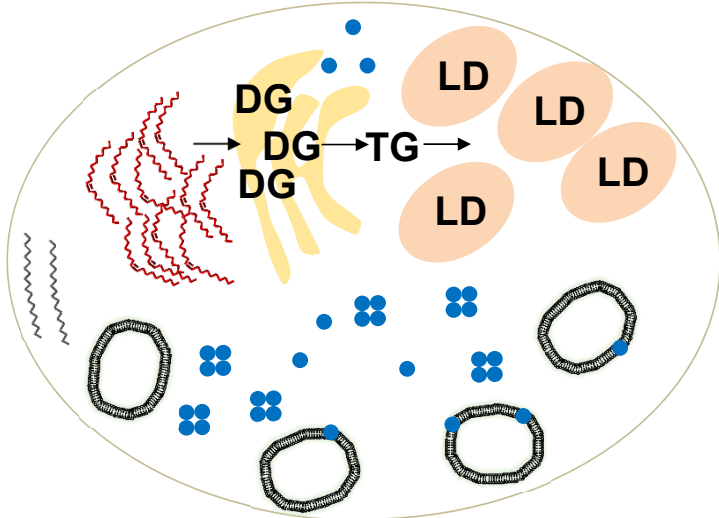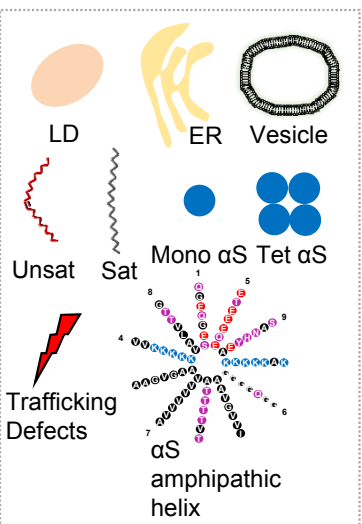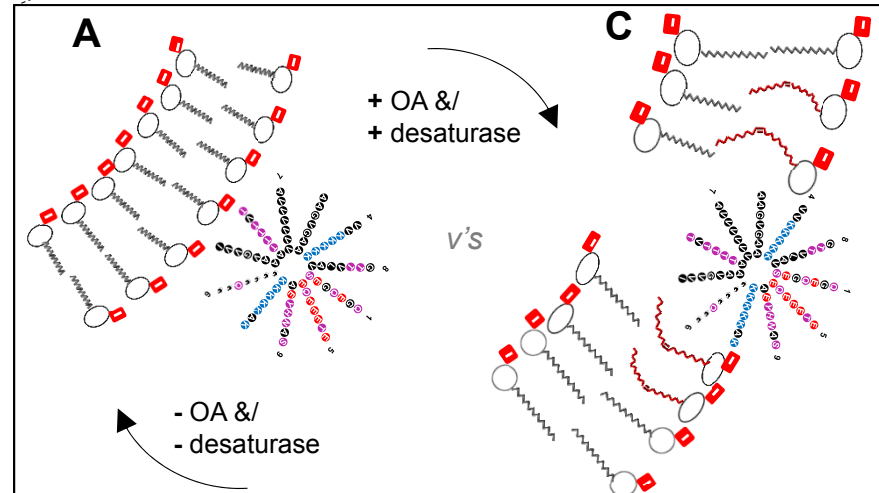

Figure S6

**Supplementary Table 1: Abbreviations (See STAR Methods)**

|            |                                         |
|------------|-----------------------------------------|
| $\alpha$ S | $\alpha$ -synuclein                     |
| AcCa       | Acylcarnitine                           |
| Cer        | Ceramide                                |
| Cer G1/G2  | Glucosylceramide                        |
| Cer P      | Ceramide phosphate                      |
| ChE        | Cholesterol                             |
| CL         | Cardiolipin                             |
| CPY        | Carboxypeptidase Y                      |
| DAergic    | Dopaminergic                            |
| DG         | Diglyceride                             |
| FA         | Fatty acid                              |
| fPD        | Familial Parkinson's disease            |
| GWAS       | Genome-wide association studies         |
| iPSC       | Induced pluripotent stem cells          |
| LCMS       | Liquid chromatography/mass spectrometry |
| LD         | Lipid droplet                           |
| LPC        | Lysophosphatidylcholine                 |
| LPE        | Lysophosphotidylethanolamine            |
| LPG        | Lysophosphatidylglycerol                |
| LPI        | Lysophosphatidylinositol                |
| LPS        | Lysophosphatidylserine                  |
| MG         | Monoglyceride                           |
| OA         | Oleic acid                              |
| PA         | Palmitic acid                           |
| PC         | Phosphatidylcholine                     |
| PD         | Parkinson's disease                     |
| PE         | Phosphatidylethanolamine                |
| PG         | Phosphatidylglycerol                    |
| PI         | Phosphatidylinositol                    |
| POA        | Palmitoleic acid                        |
| PS         | Phosphatidylserine                      |
| SCD        | Stearoyl-coA desaturase                 |
| Sm         | Sphingomyelin                           |
| So         | Sphingosine                             |
| SE         | Sterol ester                            |
| ST         | Stearic acid                            |
| TG         | Triglyceride                            |
| UFA        | Unsaturated fatty acid                  |



**Table S2: Statistical Analysis of Yeast Curves (Fig 1, 2, 3, S1, S2)**

| Figure Reference | Comparison Strains & (Condition) | <i>T-TEST with Bonferroni (p value)</i> |                      |
|------------------|----------------------------------|-----------------------------------------|----------------------|
|                  |                                  | Max Growth                              | Area Under the Curve |
| S1G              | WT vs DGA1Δ/LRO1Δ (-αS)          | 0.182250756272921                       | 0.79786106193493     |
| 1D               | WT vs DGA1Δ/LRO1Δ (+αS)          | 0.0172061250774888                      | 0.0165862574014929   |
| S1G              | WT vs ARE1Δ/ARE2Δ (-αS)          | 0.403801909434348                       | 0.133663413791191    |
| 1D               | WT vs ARE1Δ/ARE2Δ (+αS)          | 0.386848035791176                       | 0.135108422221598    |
| S1G              | WT vs ΔLD (-αS)                  | 0.563809630586069                       | 0.0948601347107356   |
| 1D               | WT vs ΔLD (+αS)                  | 0.00519915343722351                     | 0.0287169654024982   |
| S2G              | WT vs OLE1 damp (-αS)            | 0.301500600676801                       | 0.586087132035938    |
| 3E               | WT vs OLE1 damp (+αS)            | 2.36280800792935e-05                    | 0.00536958614707013  |
| S1I              | WT vs TGL3Δ/TGL4Δ (-αS)          | 0.0207775806052023                      | 0.823429457242472    |
| 2C               | WT vs TGL3Δ/TGL4Δ (+αS)          | 0.00163792253496253                     | 0.012519305844174    |
| S2F              | WT vs Acc1 hyp (-αS)             | 0.804850663364776                       | 0.0739183879855935   |
| S2E              | WT vs Acc1 hyp (+αS)             | 9.05423467869632e-06                    | 1.57804867746754e-05 |
| S2C              | WT VS WT+0.001% OA (-αS) (18:1)  | 0.647017250389983                       | 0.662965586287573    |
| 3D               | WT VS WT+0.001% OA (+αS) (18:1)  | 0.0506284477546262                      | 0.0712261344554862   |
| S2C              | WT VS WT+0.01% OA (-αS) (18:1)   | 0.481618163175302                       | 0.368538565614384    |
| 3D               | WT VS WT+0.01% OA (+αS) (18:1)   | 0.00372373215149859                     | 4.61887825054233e-06 |
| S2D              | WT VS WT+0.001% ST (-αS) (18:0)  | 0.937349948778449                       | 0.633861510654645    |
| S2D              | WT VS WT+0.001% ST (+αS) (18:0)  | 0.35178695637417                        | 0.748302525319572    |
| S2D              | WT VS WT+0.01% ST (-αS) (18:0)   | 0.304819828711373                       | 0.377256773721823    |
| S2D              | WT VS WT+0.01% ST (+αS) (18:0)   | 0.00496341004388248                     | 0.765970441122609    |
| S2D              | WT VS WT+0.001% PA (-αS) (16:0)  | 0.677902161134442                       | 0.743927345245882    |
| S2D              | WT VS WT+0.001% PA (+αS) (16:0)  | 0.0149645665179657                      | 0.0471876452323082   |
| S2D              | WT VS WT+0.01% PA (-αS) (16:0)   | 0.250593753363389                       | 0.177705977447314    |
| S2D              | WT VS WT+0.01% PA (+αS) (16:0)   | 0.332658988866257                       | 0.277160328702035    |
| S2D              | WT VS WT+0.001% POA (-αS) (16:1) | 0.677902161134442                       | 0.743927345245882    |
| S2D              | WT VS WT+0.001% POA (+αS) (16:1) | 0.332658988866257                       | 0.277160328702035    |
| S2D              | WT VS WT+0.01% POA               | 0.377969868162975                       | 0.44058044646484     |



|     |                                    |                     |                      |
|-----|------------------------------------|---------------------|----------------------|
|     | (-αS) (16:1)                       |                     |                      |
| S2D | WT VS WT+0.01% POA<br>(+αS) (16:1) | 0.0688411083808073  | 0.0487465831390694   |
| S1A | Vctr 0nm vs Vctr 2nm               | 0.428486307790048   | 0.359443484136673    |
| S1A | Vctr 0nm vs Vctr 5nm               | 0.417541591955535   | 0.526318640832264    |
| S1A | Vctr 0nm vs Vctr 10nm              | 0.303235805224668   | 0.269959826856608    |
| S1B | WT 0nm vs αS 2nm                   | 0.233871972757606   | 0.0628619227761856   |
| S1B | WT 0nm vs αS 5nm                   | 0.00101397571107858 | 0.00190964232203463  |
| S1B | WT 0nm vs αS 10nm                  | 0.00532226268016584 | 0.000397058609490757 |
| S1J | WT (-αS) vs WT (-αS)<br>+choline   | 0.321068877475049   | 0.585482632878353    |
| 2F  | WT (+αS) vs WT (+αS)<br>+choline   | 0.00971375157070605 | 0.0224402622338679   |
| S2J | WT vs FLD1Δ (-αS)                  | 0.356165004376557   | 0.488579631656867    |
| S2I | WT vs FLD1Δ (+αS)                  | 0.00721956351927037 | 0.0102584087608092   |
| S2J | WT vs LBD16Δ (-αS)                 | 0.491756144749409   | 0.243520413749671    |
| S2I | WT vs LBD16Δ (+αS)                 | 0.00125959263791623 | 0.00421924045444203  |

## Supplementary Figure Legends

**Suppl. Fig 1** (Relates to Fig 1 and Fig 2) - (A) Growth curves for vector strain with increasing concentrations of inducer (estradiol) treatment. Expression of vector in wt strain background. (B) Growth curves for  $\alpha$ S strain with increasing concentrations of inducer (estradiol) treatment. Expression of  $\alpha$ S in wt strain background. See Table S2 for statistical analysis of yeast growth curves. (C) Protein expression in strains used for lipid profile. Western blot showing protein expression of vector control and  $\alpha$ S in lipid-profiled strains with increasing concentrations of inducer (estradiol). Quantification of this blot at  $\alpha$ S 2 nm:5 nm and 5 nm:10 nm yields ratios of 1:1.9  $\alpha$ S and 1:1.8  $\alpha$ S, respectively. Quantification of this blot at gfp 2 nm:5 nm and 5 nm:10 nm yields ratios of 1:1.7 gfp and 1:2.0 gfp, respectively (post normalization to PGK1 loading control). (D) Cell viability of  $\alpha$ S-expressing cells at 12h post induction. Data on percent cell viability of yeast cells expressing  $\alpha$ S with increasing concentrations of inducer (estradiol). Numbers presented are average of duplicates. (E) Lipid profiles of human  $\alpha$ S expression in yeast at 12h post induction. These profiles show triplicate samples for averages presented in Fig 1A. Baseline abundance (Abd) of each lipid species is indicated by a red/blue bar on the left of the heat map (relative scale from -3 to 3, see key). Baseline abundance was calculated on the basis of the vector strain with 0 nanomolar (nM) inducer (estradiol). Yellow/Blue heatmap coloring is a representation of a given lipid species relative to the median of the logs across all samples for that lipid species; data for 0, 2, 5 and 10 nM of inducer are shown. (relative log scale from -3 to 3, see key). Status of saturation (presence of double bonds [DB]) of each lipid species is indicated by grey (>1 DB) or black (0 DB) bar on the right of the heat map. Lipid species are indicated by color and in the order of the key on the right of the map. DG; TG; CL; LPC; LPE; LPI; LPS; PC; PE; PG; PI; PS. (F) Lipid profiles of human  $\alpha$ S expression in yeast at 6h post induction. Baseline abundance (Abd) of each

lipid species is indicated by a red/blue bar on the left of the heat map (relative scale from -3 to 3, see key). Baseline abundance was calculated on the basis of the vector strain with 0 nanomolar (nM) inducer (estradiol). Yellow/Blue heatmap coloring is a representation of a given lipid species relative to the median of the logs across all samples for that lipid species; data for 0, 2, 5 and 10 nM of inducer are shown. (relative log scale from -3 to 3, see key). Status of saturation (presence of double bonds [DB]) of each lipid species is indicated by grey (>1 DB) or black (0 DB) bar on the right of the heat map. Lipid species are indicated by color and in the order of the key on the right of the map. DG; TG; CL; LPC; LPE; LPI; LPS; PC; PE; PG; PI; PS. (G) Growth curves for uninduced wt, *dga1Δ lro1Δ*, *are1Δ are2Δ* and (LDΔ) *dga1Δ lro1Δ+are1Δ are2Δ*. Growth curves of yeast strains were compared without  $\alpha$ S expression (uninduced) in wt, *dga1Δ lro1Δ*, *are1Δ are2Δ* and (LDΔ) *dga1Δ lro1Δ+are1Δ are2Δ* strain backgrounds. X-axis: hrs; Y-axis: OD600nm. See Table S2 for statistical analysis of yeast growth curves. (H) Neutral lipid profiles of human  $\alpha$ S expression in yeast in wt and *dga1Δ lro1Δ* strain backgrounds. These profiles show triplicate samples for averages presented in Fig 2A. Yellow/Blue heatmap coloring is a representation of a given lipid species relative to the median of the logs across all samples for that lipid species; data for 0, 2, 5 and 10 nM of inducer are shown. (relative log scale from -3 to 3, see key). The time point of 6 h post induction was chosen because the *dga1Δ lro1Δ* strain has enhanced toxicity over wt and we wanted to ensure that profiling was performed before significant toxicity differences were evident. (I) Growth curves for wt, *tgl3Δ/tgl4Δ* strains without  $\alpha$ S expression. Growth curves of yeast strains were compared without  $\alpha$ S expression in wt and *tgl3Δ/tgl4Δ* strain backgrounds. X-axis: hr; Y-axis: OD 600 nm. See Table S2 for statistical analysis of yeast growth curves. (J) Growth curves for yeast untreated and treated with choline in the absence of  $\alpha$ S. X-axis: hrs; Y-axis: OD600nm. See Table S2 for statistical analysis of yeast growth curves.

**Suppl. Fig 2** – (Relates to Fig 3) (A) FA profiles for  $\alpha$ S expressing yeast strains at 12h post induction. Intracellular FA analysis of  $\alpha$ S expressing and vector control wt yeast at 12h post induction. Results are the average of triplicates and error bars represent std deviation. 0, 2, 5, 10 refer to nM concentrations of estradiol inducer. (B) FA profiles for  $\alpha$ S expressing yeast strains at 6h post induction. Intracellular FA analysis of  $\alpha$ S expressing and vector control wt yeast at 6h post induction. Results are the average of triplicates and error bars represent std deviation. 0, 2, 5, 10 refer to nM concentrations of estradiol inducer. (C) Growth curves for wt yeast strain treated with OA without  $\alpha$ S expression. X-axis: hrs; Y-axis: OD600 nm. See Table S2 for statistical analysis of yeast growth curves. (D) Growth curves for wt yeast strain treated with palmitic acid (PA) (16:0), palmitoleic acid (POA) (16:1) and stearic acid (ST) (18:0) in the presence (2nm inducer) and absence (0nm inducer) of  $\alpha$ S. 2nm estradiol was used to induce to best visualize the impact of fatty acids on  $\alpha$ S toxicity. X-axis: hrs; Y-axis: OD600nm. See Table S2 for statistical analysis of yeast growth curves. (E) Growth curves for  $\alpha$ S expressing in wt and *ACC1* hyp strain backgrounds. Growth curves of wt and *ACC1* hyp yeast strains expressing  $\alpha$ S. 2nm estradiol was used to induce to best visualize the impact of *ACC1* hyp on  $\alpha$ S toxicity. X-axis: hrs; Y-axis: OD600 nm. See Table S2 for statistical analysis of yeast growth curves. (F) Growth curves for wt and *ACC1* hyp strains without  $\alpha$ S expression. Growth curves of wt and ACC1 hyp strain backgrounds without  $\alpha$ S expression. X-axis: hrs; Y-axis: OD600nm. See Table S2 for statistical analysis of yeast growth curves. (G) Growth curves for wt and *ole1 damp* strains without  $\alpha$ S expression (0nm inducer). X-axis: hrs; Y-axis: OD600nm. See Table S2 for statistical analysis of yeast growth curves. (H) Neutral lipid profiles of human  $\alpha$ S expression in yeast at 12 h post induction in wt and *ole1 damp* strain backgrounds. These profiles show triplicate samples for averages presented in Fig 3F. Yellow/Blue heatmap coloring is a representation of a given lipid species relative to the median of the logs across all samples for that lipid species. The relative log scale (-3 to 3) for yellow/blue

representation is indicated by a smaller yellow/blue bar on the left of the heatmap. 0, 0 refer to nanomolar (nM) of estradiol (inducer). (I) Growth curves for  $\alpha$ S expressing wt, *sei1* $\Delta$ , *ldb16* $\Delta$  strain backgrounds. 10nM estradiol inducer was used to best visualize the suppression of  $\alpha$ S toxicity in these mutants relative to wt. X-axis: hrs; Y-axis: OD600nm. See Table S2 for statistical analysis of yeast growth curves. (J) Growth curves for wt, *sei1* $\Delta$ , *ldb16* $\Delta$  strain backgrounds without  $\alpha$ S expression (0nM inducer). X-axis: hrs; Y-axis: OD600nm. See Table S2 for statistical analysis of yeast growth curves. (K) FA profiles of  $\alpha$ S-expressing wt, *sei1* $\Delta$ , *ldb16* $\Delta$  strain backgrounds. Intracellular FA analysis of  $\alpha$ S expressing wt, *sei1* $\Delta$ , *ldb16* $\Delta$  strains at 12 h post induction. Results are the average of triplicates and error bars represent standard deviation. 0, 2, 5, 10 refer to nM concentrations of estradiol inducer. (L) Neutral lipid profiles of human  $\alpha$ S expression in wt, *sei1* $\Delta$ , *ldb16* $\Delta$  strain backgrounds at 12h post induction. Yellow/Blue heatmap coloring is a representation of a given lipid species relative to the median of the logs across all samples for that lipid species. The relative log scale (-3 to 3) for yellow/blue representation is indicated by a smaller yellow/blue bar on the left of the heatmap. 0, 5, 10 refer to nanomolar (nM) of estradiol (inducer). The time point of 12 h post induction was chosen because the *sei1* $\Delta$  and *ldb16* $\Delta$  strains suppress toxicity so profiling was possible without significant toxicity at a 12hr time point. (M)  $\alpha$ S-induced ER accumulation of CPY was ameliorated in *sei1* $\Delta$ , *ldb16* $\Delta$  strain backgrounds relative to wt at 12h post induction. Immunoblot of CPY in wt, *sei1* $\Delta$  and *ldb16* $\Delta$  strain backgrounds. CPY was not retained in the ER in the *sei1* $\Delta$  and *ldb16* $\Delta$  strains expressing  $\alpha$ S relative to wt expressing  $\alpha$ S. ImageJ was used to quantify retention of CPY in the ER. T-test analysis generated p=0.04 for wt compared with *sei1* $\Delta$  and p=0.01 for wt vs *ldb16* $\Delta$  at n=3 for each strain type.

**Suppl. Fig 3** – (Relates to Fig 4) (A) Lipid profiles of human  $\alpha$ S expression in rat cortical neurons. These profiles show triplicate samples for averages presented in Fig 4A. Baseline abundance (Abd) of each lipid species is indicated by a red/blue bar on the left of the heat map (relative scale from -3 to 3, see key). Baseline abundance was calculated on the basis of MOI1 at day 14 and day 20. Yellow/Blue heatmap coloring is a representation of a given lipid species relative to the median of the logs across all samples for that lipid species. The relative log scale (-3 to 3) for yellow/blue representation is indicated by a smaller yellow/blue bar on the left of the heatmap. Status of saturation (presence of double bonds [DB]) of each lipid species is indicated by grey (>1 DB) or black (0 DB) bar on the right of the heat map. Lipid species are indicated by color and in the order of the key on the right of the map. AcCa; Cer; CerG1/G2; CerP; ChE; MG; DG; SM; SO; TG; CL; LPC; LPE; LPG; LPI; LPS; PC; PE; PG; PI; PS. Two MOIs were analyzed: MOI1 and MOI5. (B) Toxicity (% ATP) measurements for rat cortical neurons expressing human  $\alpha$ S. No Inf: no infection at 14d and 20d.  $**p < 0.005$  by one way Anova. (C) Protein expression in lipid profiled lines. Western blot showing protein expression of  $\alpha$ S and vector in lipid-profiled neuronal samples. Quantification of the day 14 blot at  $\alpha$ S MOI1:MOI5 and gfp MOI1:MOI5 yields ratios of  $\sim 1:4.2$   $\alpha$ S and 1:3.6 gfp, respectively. Quantification of the day 21 blot at  $\alpha$ S MOI1:MOI5 and gfp MOI1:MOI5 yields ratios of  $\sim 1:3.2$   $\alpha$ S and 1:3.1 gfp, respectively (post normalizing to tubulin loading control). (D) Toxicity (%ATP) data for vector vs  $\alpha$ S expression in rat cortical neurons, 3 weeks post infection.  $p < 0.05$  by unpaired t-test. (E) Toxicity (%ATP) data in rat cortical neurons, 3 weeks post infection, annotated with RT-PCR expression analysis of knockdown of *DGAT1* and *DGAT2* in vector and  $\alpha$ S expressing rat cortical neurons. C: control; D1 k/d: knockdown of *DGAT1*; D2 k/d: knockdown of *DGAT2*; D1+D2 k/d: knockdown of *DGAT1* and *DGAT2*. Significance was tested by unpaired t-test,  $*p < 0.05$ ;  $**p < 0.01$ . (F) Toxicity data annotated with RT-PCR expression analysis of knockdown of *LPINI*, 2,3 in vector and  $\alpha$ S expressing rat cortical

neurons. C: control; L1 k/d: knockdown of *LPIN1*; L2 k/d: knockdown of *LPIN2*; L3 knockdown of *LPIN3*. \* $p < 0.01$ , \*\*  $p < 0.005$  by one way Anova. (G) Inhibition of Seipin rescues  $\alpha$ S toxicity. Survival of neurons was measured following knockdown of Seipin in control rat cortical neurons and rat cortical neuron expressing human  $\alpha$ S. All graphed data are relative to vector control set at 100%. Y-axis: % Viability on the basis of conversion of Resazurin to Resorufin (Cell Titer Blue, Promega) \*\*\*\*  $p < 0.0001$  by one way Anova. (H) Toxicity (% ATP) data annotated with RT-PCR expression analysis of knockdown of seipin in vector and  $\alpha$ s expressing rat cortical neurons. C: control. \*\*  $p < 0.001$  by one way Anova.

**Suppl. Fig 4** - (Relates to Fig 4) (A) Intracellular FA analysis of  $\alpha$ S expression in rat cortical neurons. Bars represent the average of triplicates and error bars represent standard deviation of triplicates. Time point is 14 d. (B) Treatment with exogenous OA enhances  $\alpha$ S toxicity in rat cortical neurons. Treatment of  $\alpha$ S-expressing rat cortical neurons with two concentrations of OA. ATP readings are 14 days after addition of OA. \*  $p < 0.05$  by one way Anova. (C & D) Treatment with exogenous fatty acids: C=control, ST=stearic acids, OA=oleic acid, PA=palmitic acid, POA=palmitoleic acid.  $\alpha$ S toxicity in rat cortical neurons. Cell Titer Blue (Promega) readings were taken 21 days after fatty acid addition. \*\*\*\* $p < 0.0001$ , \*  $p < 0.05$  by one way Anova. (E) Toxicity data annotated with RTPCR expression analysis of *SCD1* knockdown in vector and  $\alpha$ S expressing rat cortical neurons. C=control. \*\*  $p < 0.005$  by one way Anova. (F) Inhibition of Scd1 rescues  $\alpha$ S toxicity. Survival of neurons was measured following treatment with Scd1 inhibitor (ab142089) in control rat cortical neurons and rat cortical neuron expressing human  $\alpha$ S. All graphed data are relative to vector control set at 100%. Data were generated 14 days after inhibitor was applied to cells. Y-axis: % Viability on the basis of conversion of Resazurin to Resorufin (Cell Titer Blue, Promega) X-axis: concentration of inhibitor. \*\*\*\*  $p < 0.0001$ ; \*  $p < 0.05$  by one way



Anova. (G) Inhibition of Scd1 rescues AK release associated with  $\alpha$ S expression. Survival of neurons was measured following treatment with Scd1 inhibitor (CAY10566) in control rat cortical neurons and rat cortical neuron expressing human  $\alpha$ S. All graphed data are relative to vector control set at 100%. Data were generated 14 days after inhibitor was applied to cells. Y-axis: % Adenylate kinase released relative to the vector control. \*\*\*\*  $p < 0.0001$  by one way Anova. (H) Inhibition of Scd1 rescues *DGAT*-associated toxicity in rat cortical neurons. *DGAT* expression was knocked down in control rat cortical neurons and in rat cortical neurons expressing human  $\alpha$ S. Neurons were treated with DMSO or Scd inhibitor and neuronal survival was measured. All graphed data is relative to vector control set at 100%. Data were generated 14 days after inhibitor was applied to cells. Y-axis: % Viability calculated on the basis of  $n=3$  for all samples. \*\*\*  $p \leq 0.0007$  by one way Anova. (I) Intracellular FA analysis of  $\alpha$ S expression in rat cortical neurons relative to a vector control in control (C) neurons, neurons with Scd1 knockdown and neurons with Seipin knockdown. Bars represent the average of triplicates and error bars represent standard deviation of triplicates. Time point is 14 d. \*\*  $p < 0.001$ , \*\*\*  $P < 0.005$  by one way Anova. (J) Analysis of DG content in rat cortical neurons relative to a vector control in control (C) neurons, neurons with Scd1 knockdown and neurons with Seipin knockdown. Bars represent the average of triplicates and error bars represent standard deviation of triplicates. \*\*  $p < 0.001$ , \*\*\*  $P < 0.005$  by one way Anova.

**Suppl. Fig 5** – (Relates to Fig 1, Fig 4, Fig 5, Fig 7) (A & B) Summary (based on triplicates) of % changes of DG, TG, PC, PE, PI, PS (presented in Fig 1A, 4A) at 12 h post induction (yeast) and in rat cortical neurons at 14d, 20d at MOI1 and MOI5 for expression of human  $\alpha$ S and a vector control. Stacked bar charts were constructed in Microsoft Excel. In summary: Yeast: DG increases upon  $\alpha$ S expression (light blue bars). Rat cortical neurons: DG increases at MOI1 (light blue bars),

particularly at day 14. Yeast: TG increase (orange bars) upon  $\alpha$ S expression. Rat cortical neurons: TG (orange bars) increase is at both time points at MOI5. Yeast: PC decrease upon  $\alpha$ S expression (gray bars). Rat cortical neurons: PC decrease (gray bars) at MOI5 at both time points. PE is more abundant as total % of lipid in the rat cortical neurons than yeast. Yeast: PE shows no major change. Rat cortical neurons: PE is decreased at MOI5 at both time points. Yeast: PI (dark blue bars) decreases slightly upon  $\alpha$ S expression relative to vector. Rat cortical neurons: PI decreases (dark blue bars) upon  $\alpha$ S expression. Yeast: PS decreases (green bars) upon  $\alpha$ S expression. Rat cortical neurons: PS decreases slightly at MOI5 at both time points and at MOI1 at day 20. (C) Lipid profiles of  $\alpha$ S overexpression in human iPSC-derived neurons. These profiles show triplicate samples for averages presented in Fig 5A. Baseline abundance (Abd) of each lipid species is indicated by a red/blue bar on the left of the heat map (relative scale from -3 to 3, see key). Baseline abundance was calculated on the basis of control cells. Degree of baseline abundance (Baseline Abd Scale) is indicated by a smaller red/blue bar on the left of the heatmap. Yellow/Blue heatmap coloring is a representation of a given lipid species relative to the median of the logs across all samples for that lipid species. The relative log scale (-3 to 3) for yellow/blue representation is indicated by a smaller yellow/blue bar on the left of the heatmap. Status of saturation (presence of double bonds [DB]) of each lipid species is indicated by grey (>1 DB) or black (0 DB) bar on the right of the heat map. Lipid species are indicated by color and in the order of the key on the right of the map. AcCa; Cer; CerG1/G2; CerP; ChE; MG; DG; SM; SO; TG; CL; LPC; LPE; LPG; LPI; LPS; PC; PE; PG; PI; PS. Lipid profiling was performed following  $\alpha$ S overexpression (MOI-5 and day 14 post-transduction) and compared with control neurons (transduced with control Lentivirus). (D) Toxicity measurements of overexpressing  $\alpha$ S in human iPSCs-derived neurons. No Inf: no infection. Y axis: % ATP. \*\*  $p < 0.005$ , \*\*\*  $p < 0.005$  by one way Anova. (E) Protein expression in lipid profiled neurons. Western blot showing protein expression of vector and  $\alpha$ S in

lipid-profiled lines. (F) Intracellular FA analysis of  $\alpha$ S overexpression in human iPS-derived neurons. Bars represent the average of triplicates and error bars represent standard deviation of triplicates. (G) Treatment with exogenous OA enhances  $\alpha$ S toxicity in human iPS neurons. Viability readings are 14 days after addition of OA. Y axis: %ATP. n=3 for all samples. \* p<0.05 by one way Anova. (H) Neutral lipid profiles of human patient  $\alpha$ S triplication neurons and isogenic corrected control. Yellow/Blue heatmap coloring is a representation of a given lipid species relative to the median of the logs across all samples for that lipid species. The relative log scale (-3 to 3) for yellow/blue representation is indicated by a smaller yellow/blue bar on the left of the heatmap. Lipid species are indicated by color and in the order of the key on the right of the map. DG; TG. Lipid profile was performed following 24days after differentiation to neurons. (I) Neutral lipid profiles of human neurons expressing wt  $\alpha$ S and the E46K familial  $\alpha$ S PD mutation (Dettmer et al., 2017; Soldner et al., 2011b; Soldner et al., 2016). Yellow/Blue heatmap coloring is a representation of a given lipid species relative to the median of the logs across all samples for that lipid species. The relative log scale (-3 to 3) for yellow/blue representation is indicated by a smaller yellow/blue bar on the left of the heatmap. Lipid species are indicated by color and in the order of the key on the right of the map. DG; TG. Lipid profile was performed following 36 days after differentiation to neurons. (J) Exogenous palmitic acid (PA), palmitoleic acid (POA), stearic acid (ST) and oleic acid (OA) were assayed for impact on  $\alpha$ S inclusion formation in M17D cells. After incubating M17D/ $\alpha$ S-3K:YFP (YFP tag  $\alpha$ S-3K under doxycycline inducible promoter) cells under serum-starved condition with two concentrations of each fatty acid for 6h, cells were induced to express the  $\alpha$ S-3K::YFP mutant and formation of inclusions was followed over 24h. After 24h, the number of inclusions (normalized by the signal of constitutively expressed mCherry) was measured and expressed in % compared to the 0  $\mu$ M OA control (n=12). Dotted line represents 100%. Y-axis: % inclusions. X-axis: concentration of fatty acid. \*\*\* p<0.0005 by one way Anova.

(K) *SCD1* Inhibition Decreases  $\alpha$ S Inclusions. M17D/ $\alpha$ S-3K:YFP cells were treated with Scd1 inhibitor (HY15700) and induced with Dox for 24h. The number of inclusions of  $\alpha$ S (normalized by the signal of mCherry constitutively expressed) was measured and expressed in % compared to the 0 $\mu$ M control (n=12). X-axis:  $\mu$ M concentration of Scd1 inhibitor (HY15700). Y-axis: % inclusions. \*\*\*\* p<0.0001 by one way Anova. (L) *SCD1* inhibition decreases  $\alpha$ S inclusions. Microscopy images showing decreased inclusions of  $\alpha$ S (green) upon treatment with 10 $\mu$ M *SCD1* inhibitor HY19762 but similar signal of mCherry (red channel). (M) Scd1 inhibition (CAY10566) increases 60kDa  $\alpha$ S:14kDa  $\alpha$ S and 80kDa  $\alpha$ S: 14kDa  $\alpha$ S. M17D/ $\alpha$ S-E46K (untagged E46K  $\alpha$ S expressed constitutively) were incubated for 48h with 10 $\mu$ M of Scd1 inhibitor (or DMSO control) then submitted to DSG crosslinking. Cell lysates were immunoblotted to detect and quantify  $\alpha$ S14,  $\alpha$ S60 and  $\alpha$ S80. N=2, n=6. Bar charts quantify differences between DMSO and Scd1 inhibitor treatments.

**Suppl. Fig 6** – (Relates to Discussion Section, Fig 1-7, S1-5) Model of cellular  $\alpha$ S biology in health and disease based on findings in this study. (A) Intact homeostasis/equilibrium:  $\alpha$ S is in equilibrium between unfolded monomers and physiological,  $\alpha$ -helical tetramers. The tetramers are principally soluble (cytosolic) while the monomers occur both in membrane-associated and cytosolic pools (Dettmer et al., 2017); (B)  $\alpha$ S-induced dyshomeostasis (initially compensated): mild accumulation of  $\alpha$ S in the absence of a genetic abnormality in lipid metabolism triggers increased OA (and other unsaturated FA) but the dyshomeostasis is tolerated and excess OA and DG are shuttled into TG and LD. (C)  $\alpha$ S-Induced dyshomeostasis (uncompensated): Substantial  $\alpha$ S accumulation +/- a genetic abnormality in lipid metabolism precludes compensation, so DG accumulate in the ER and aggravate trafficking defects. Excess OA or desaturase activity result in membrane defects. Clusters of vesicles with excess  $\alpha$ S monomers may form cytoplasmic

inclusions as reported in (Dettmer et al., 2017; Soper et al., 2008). Arrows represent genetic components of lipid metabolism pathways.
